# Supplementary material for: Network Pharmacology and Absolute Bacterial Quantification-Combined Approach to Explore the Mechanism of Tianqi Pingchan Granule Against 6-OHDA-Induced Parkinson’s Disease in Rats
Source: PubMed Central journal article supplement (PMC9121100; doi:10.3389/fnut.2022.836500), 2022-05-06

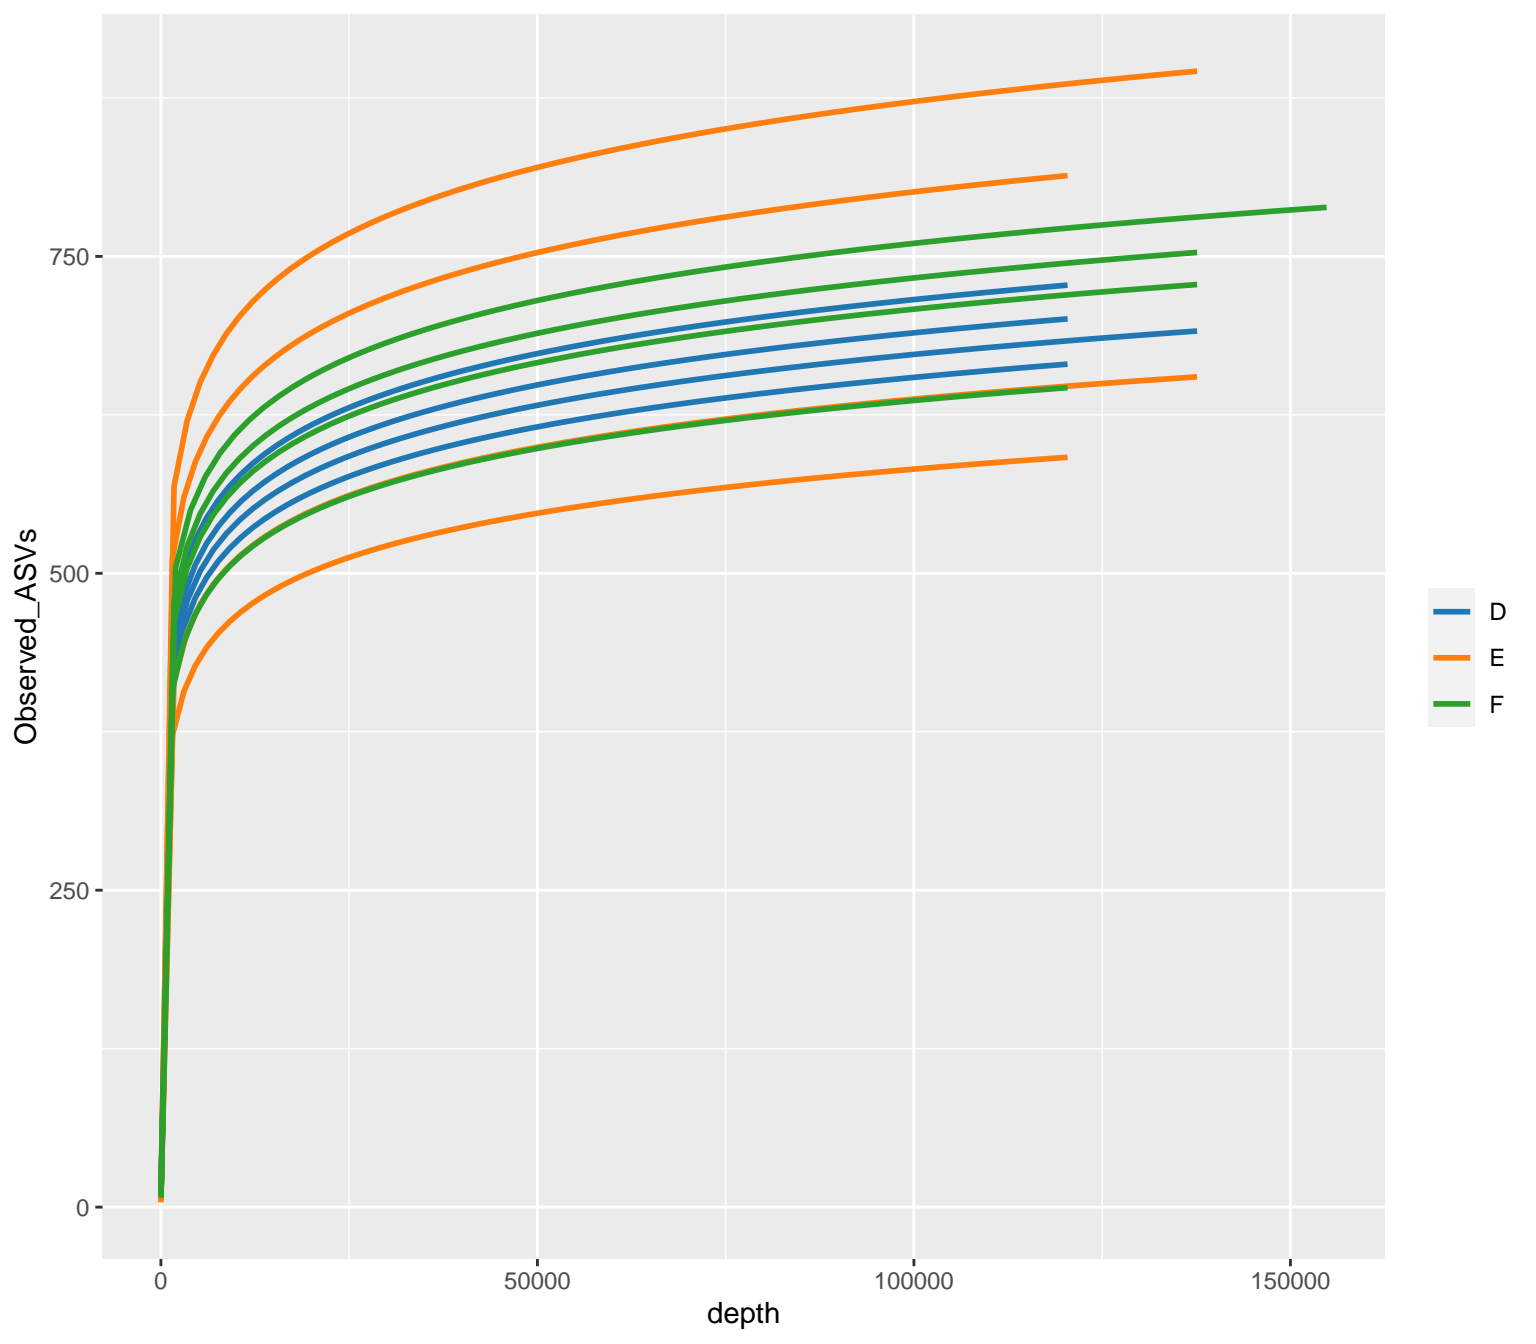

Supplement: Image_1.pdf [file Image_1.pdf]
